# Supplementary material for: Prevalence and predictors of gestational diabetes mellitus among pregnant women attending antenatal clinic in Dodoma region, Tanzania: an analytical cross-sectional study
Source: HighWire-hosted journal article supplement (doi:10.1136/bmjnph-2020-000149), 2021-03-19
Supplement: bmjnph-2020-000149supp001_data_supplement.pdf [file bmjnph-2020-000149supp001_data_supplement.pdf]

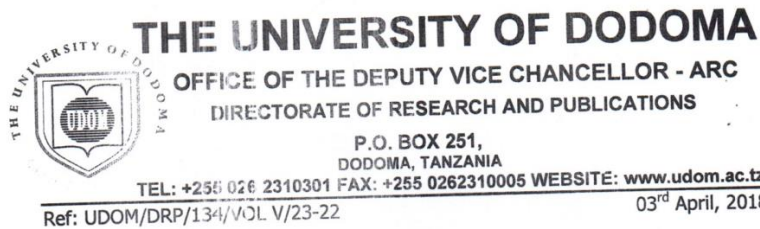

**To:** Mwajuma Mdoe,  
College of Health Sciences,  
**The University of Dodoma.**

**RE: YOUR REQUEST FOR ETHICAL CLEARANCE**

This is to certify that the proposal titled: **Prevalence and Predictors of Gestational Diabetes Mellitus among Pregnant Women who Attend Antenatal Clinic at Dodoma** has been granted ethical clearance.

The Principal Investigator of the study must ensure that the following conditions are fulfilled:

1. Progress report is submitted to the University of Dodoma.
2. Permission to publish the results is obtained from the University of Dodoma.
3. Copies of final publications are made available to the University of Dodoma.
4. Sites: Central and North zone, Tanzania.

Approval is valid for a duration provided for under clause five (5) of the Ethical Clearance Form.

Best Regards,



Prof. F. Fabian  
**Director of Research and Publications, Consultancy and Institutional Collaboration**

cc. DVC-ARC
