# Supplementary material for: Prevalence and predictors of gestational diabetes mellitus among pregnant women attending antenatal clinic in Dodoma region, Tanzania: an analytical cross-sectional study
Source: PubMed Central journal article supplement — BMJ Nutr Prev Health. 2021 Mar 19;4(1):69–79. doi: 10.1136/bmjnph-2020-000149 (PMC8258095; doi:10.1136/bmjnph-2020-000149), 2021-03-19
Supplement: bmjnph-2020-000149supp002.pdf [file bmjnph-2020-000149supp002.pdf]

Chi-square test results for factors not related with the prevalence of GDM in Dodoma Region.  
(N= 582)

| VARIABLE                       | GDM STATUS    |      |               |      | X <sup>2</sup><br>P-value                              |
|--------------------------------|---------------|------|---------------|------|--------------------------------------------------------|
|                                | POSITIVE<br>N | %    | NEGATIVE<br>N | %    |                                                        |
| <b>Occupation</b>              |               |      |               |      |                                                        |
| Self-employed                  | 104           | 25.4 | 306           | 74.6 | X <sup>2</sup> = 4.365 <sup>a</sup><br>P-value = 0.113 |
| Housewife                      | 42            | 30.7 | 95            | 69.3 |                                                        |
| Employed                       | 14            | 40.0 | 21            | 60.0 |                                                        |
| <b>Age at first conception</b> |               |      |               |      |                                                        |
| < 20 years                     | 98            | 26.3 | 274           | 73.7 | X <sup>2</sup> = 0.681 <sup>a</sup><br>P-value = 0.440 |
| 20-34 years                    | 62            | 29.5 | 148           | 70.5 |                                                        |
| <b>HIV Status</b>              |               |      |               |      |                                                        |
| Positive                       | 3             | 30.0 | 7             | 70.0 | X <sup>2</sup> = 0.032 <sup>a*</sup><br>P-value = 1    |
| Negative                       | 157           | 27.4 | 415           | 72.6 |                                                        |
| <b>Type of the family</b>      |               |      |               |      |                                                        |
| Nuclear family                 | 98            | 31.7 | 211           | 68.3 | X <sup>2</sup> = 1.313 <sup>a</sup><br>P-value = 0.140 |
| Single parent family           | 5             | 50.0 | 5             | 50.0 |                                                        |
| Extended family                | 28            | 23.9 | 89            | 76.1 |                                                        |
| Childless family               | 29            | 19.9 | 117           | 80.1 |                                                        |
| <b>Number of family member</b> |               |      |               |      |                                                        |
| 1-4 family members             | 110           | 27.4 | 291           | 72.6 | X <sup>2</sup> = 0.382 <sup>a</sup><br>P-value = 0.826 |
| 5-8 family members             | 45            | 28.1 | 115           | 71.9 |                                                        |
| 9-15 family members            | 5             | 23.8 | 16            | 76.2 |                                                        |
| <b>Number of dependants</b>    |               |      |               |      |                                                        |
| < or = 3                       | 157           | 27.5 | 413           | 72.5 | X <sup>2</sup> = 0.038 <sup>a*</sup><br>P-value = 1    |
| >3                             | 3             | 25.0 | 9             | 75.0 |                                                        |
| <b>Hb category</b>             |               |      |               |      |                                                        |
| Non anemic (>11g/dl)           | 55            | 28.9 | 133           | 71.7 | X <sup>2</sup> = 1.615 <sup>a</sup><br>P-value = 0.656 |
| Mild (9.5-10.9g/dl)            | 54            | 24.5 | 166           | 75.5 |                                                        |
| Moderate (8-9.4)               | 45            | 30.0 | 105           | 70.0 |                                                        |
| Severe (6.5-7.9g/dl)           | 7             | 28.0 | 18            | 72.0 |                                                        |
|                                |               |      |               |      |                                                        |

|                                    |     |      |     |      |                                    |
|------------------------------------|-----|------|-----|------|------------------------------------|
| <b>History of abortion</b>         |     |      |     |      |                                    |
| No                                 | 101 | 31.7 | 218 | 68.1 | $X^2 = 6.636^a$<br>P-value = 0.066 |
| Yes                                | 15  | 23.4 | 49  | 76.6 |                                    |
| Primegravidia                      | 43  | 21.7 | 155 | 78.3 |                                    |
| <b>Gravidity</b>                   |     |      |     |      |                                    |
| 1                                  | 43  | 21.7 | 155 | 78.3 | $X^2 = 6.021^a$<br>P-value = 0.055 |
| 2-4                                | 91  | 29.4 | 219 | 70.6 |                                    |
| >5                                 | 26  | 35.1 | 48  | 64.9 |                                    |
| <b>History of preterm delivery</b> |     |      |     |      |                                    |
| No                                 | 111 | 30.6 | 252 | 69.4 | $X^2 = 5.120^a$<br>P-value = 0.077 |
| Yes                                | 5   | 25.0 | 15  | 75.0 |                                    |
| Primegravidia                      | 43  | 21.7 | 155 | 78.3 |                                    |

a\*= Fishers exact test
